# Supplementary material for: Interface-tuned Mo-based nanospheres for efficient oxygen reduction and hydrogen evolution catalysis
Source: Royal Society of Chemistry journal article supplement (doi:10.1039/d0cy01311k), 2020-01-01
Supplement: d0cy01311k1.pdf [file d0cy01311k1.pdf]

## Supporting Information

### Interface-tuned Mo-based nanospheres for efficient oxygen reduction and hydrogen evolution catalysis

Qingyu Li<sup>†</sup>, Dingding Kong<sup>†</sup>, Guanhua Yang<sup>‡</sup>, Yezheng Cai<sup>\*,†</sup>, Qichang Pan<sup>†</sup>,  
Fenghua Zheng<sup>†</sup>, Zhaoling Ma<sup>\*,†</sup>, Hongqiang Wang<sup>†</sup>

<sup>†</sup>Guangxi Key Laboratory of Low Carbon Energy Materials, School of Chemistry and Pharmaceutical Sciences, Guangxi Normal University, Guilin, China.

<sup>‡</sup>School of Mechanical and Transportation Engineering, Guangxi University of Science and Technology, Liuzhou, 545006, China.

\*Corresponding authors: 18810629627@163.com (Y. Cai); zhaolingma@163.com (Z. Ma)

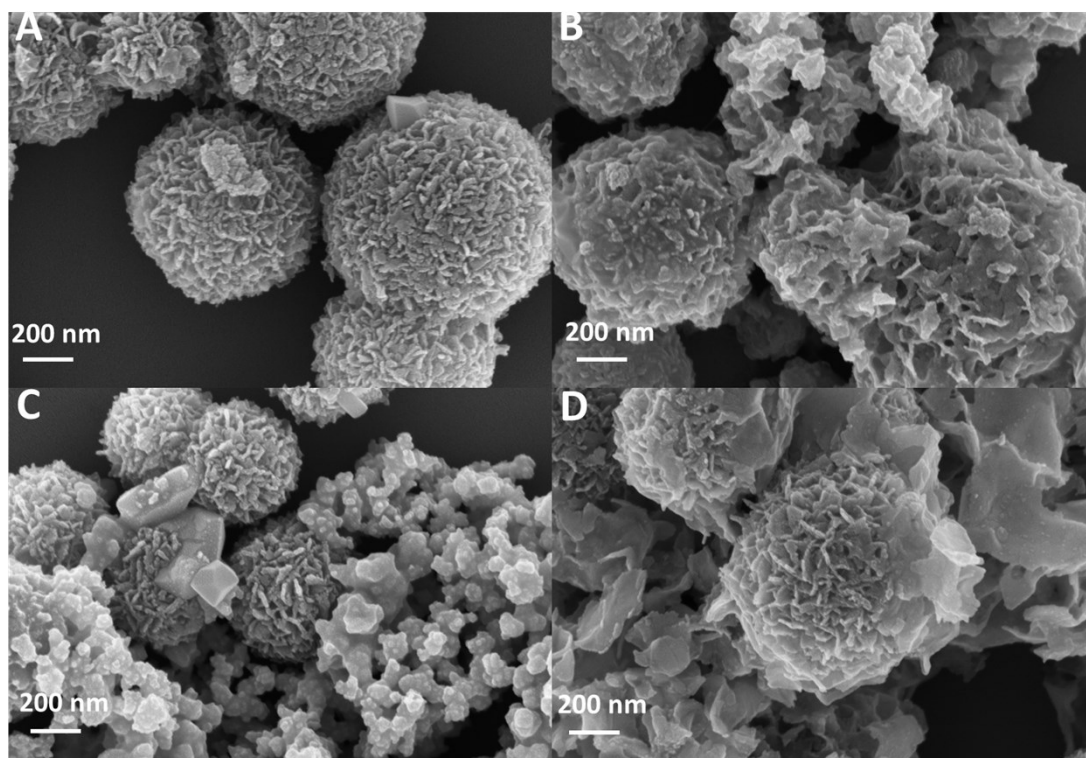

Figure S1 SEM images of (A) HNs-Co-2, (B) HNs-Co-6, (C) HNs-Co-10, and (D) HNs-Co-12 catalysts.

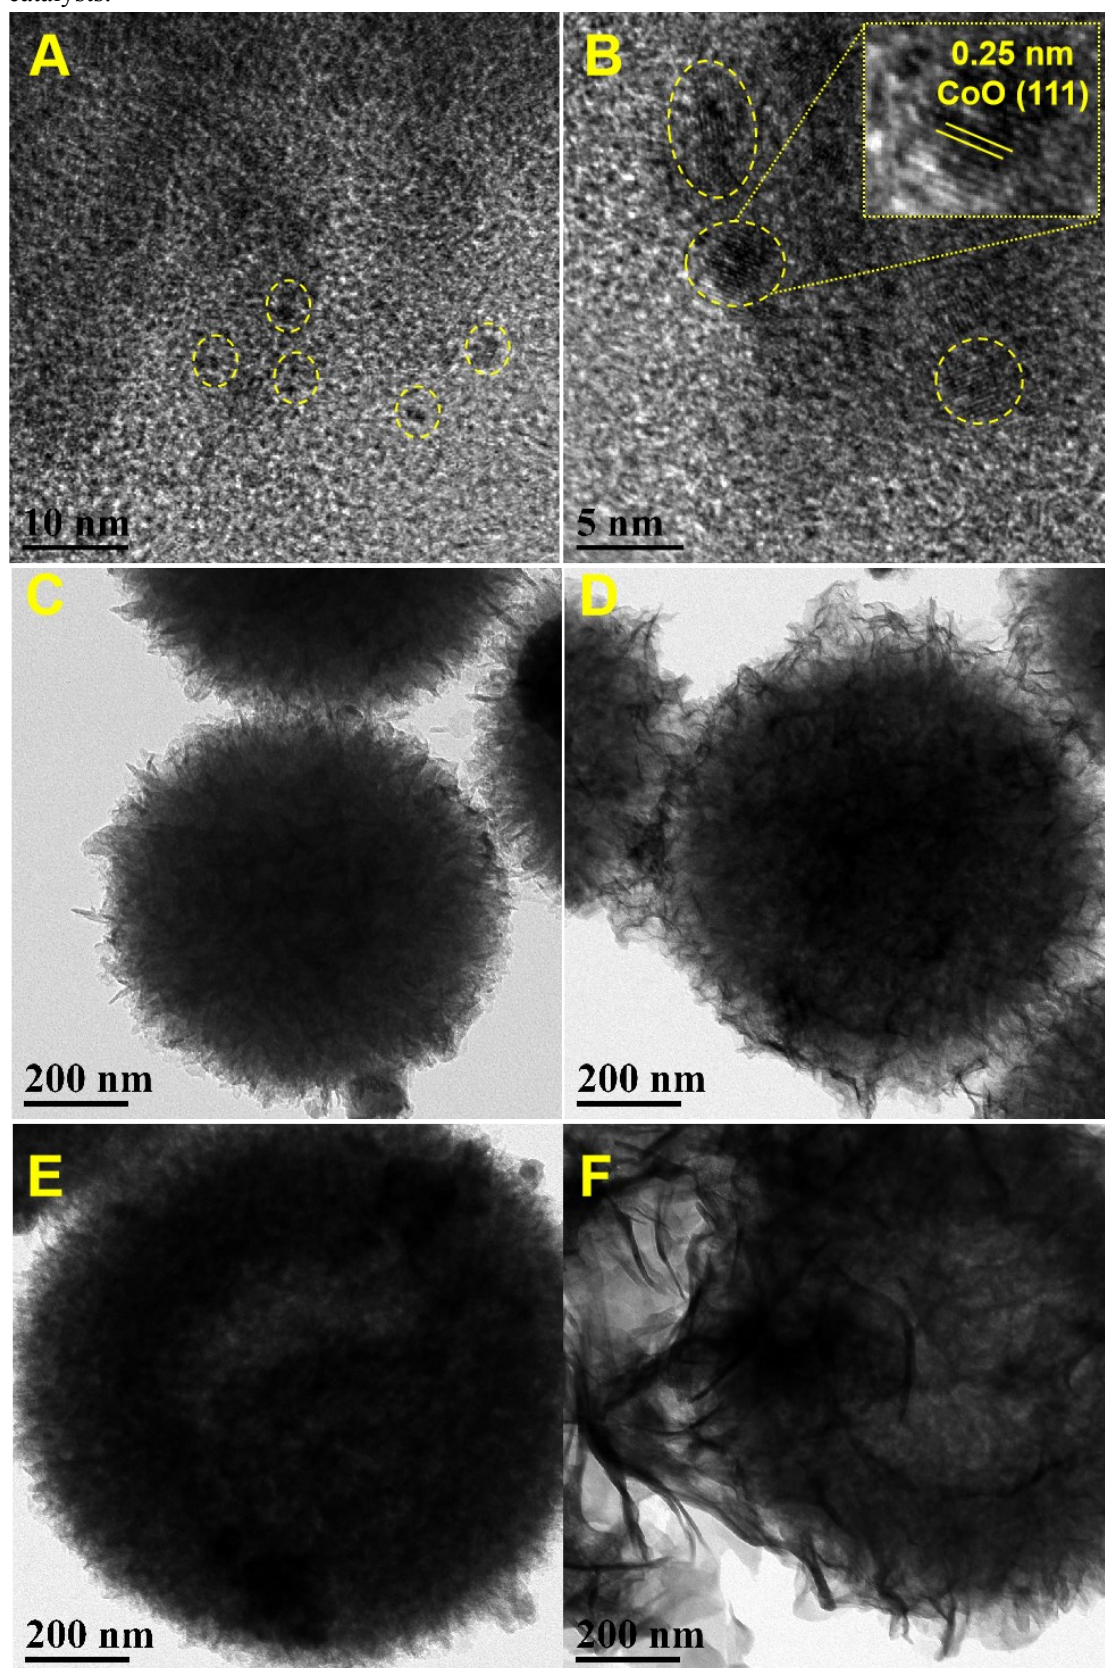

Figure S2 (A,B) High-resolution TEM images of (A) HNs and (B) HNs-Co; (C-F) HRTEM images of (C) HNs-Co-2, (D) HNs-Co-6, (E) HNs-Co-10, and (F) HNs-Co-12 catalysts.

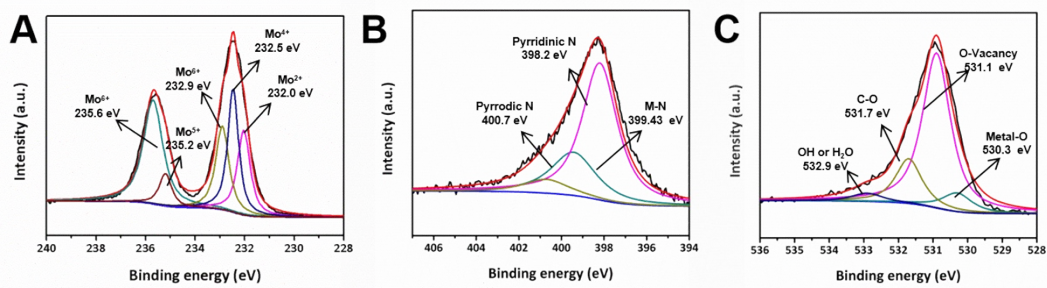

Figure S3 High-resolution (A) Mo 3d, (B) N 1s, and (C) O 1s XPS spectra of HNs.

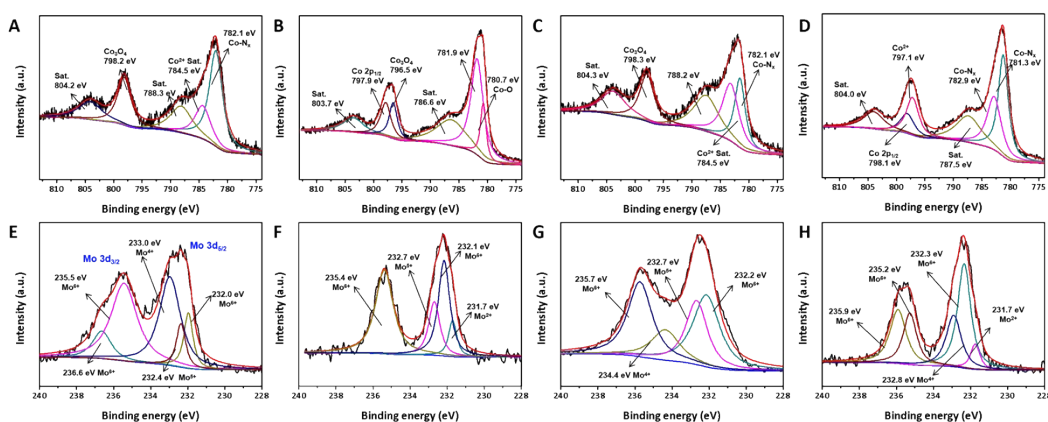

Figure S4 High resolution Co 2p and Mo 3d XPS spectra of (A, F) HNs-Co-2, (B, G) HNs-Co-6, (C, H) HNs-Co-10, and (E) HNs-Co-12 catalysts.

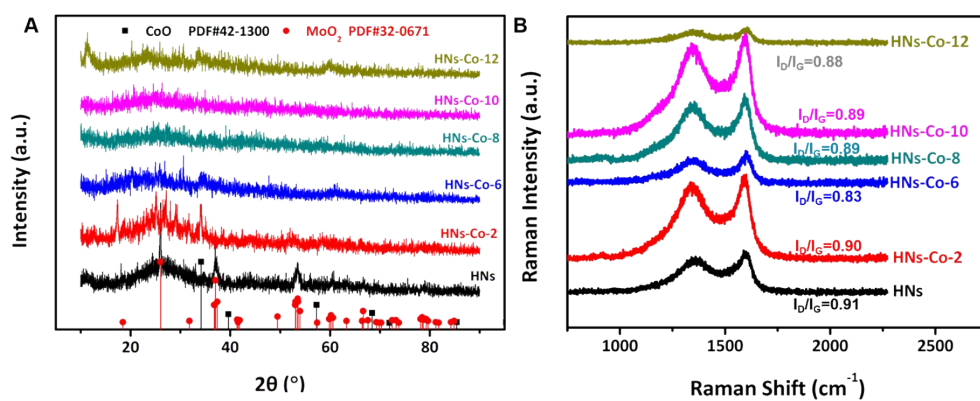

Figure S5 (A) XRD patterns and (B) Raman spectra of HNs and HNs-Co-X with different Co contents.

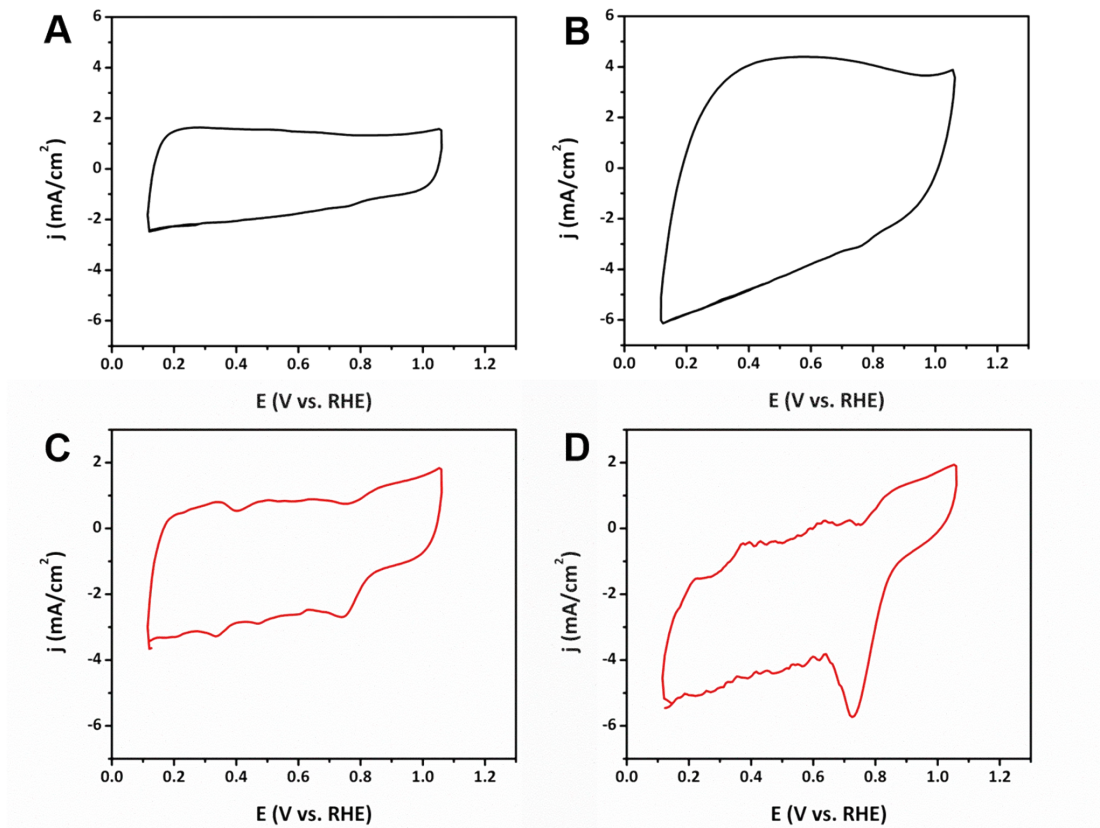

Figure S6 (A, C) CV curves of HNs and (B, D) HNs-Co catalysts in  $N_2$  and  $O_2$ -saturated 0.1 M KOH solution.

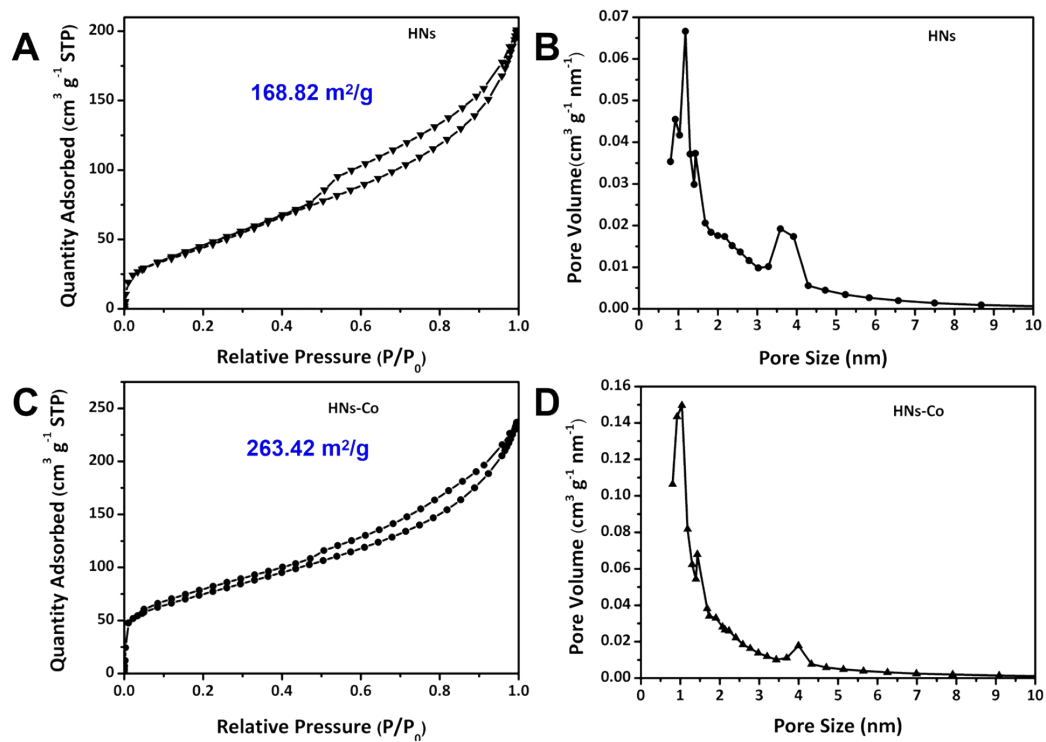

Figure S7 N<sub>2</sub> adsorption–desorption isotherms and pore size distributions of HNs (A, C) and HNs-Co (B, D) catalysts.

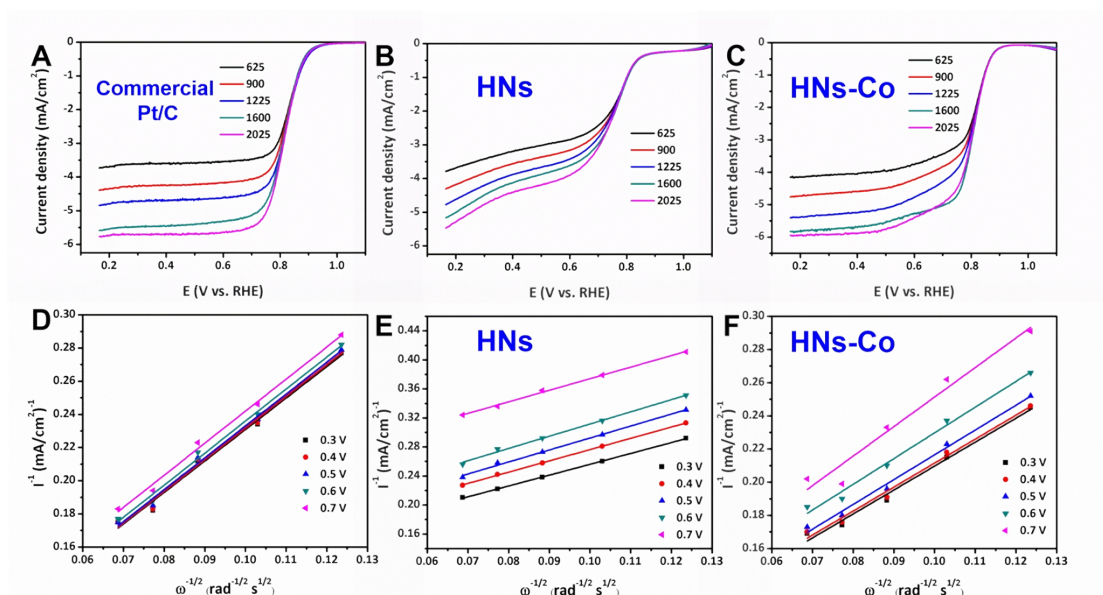

Figure S8 LSV curves in O<sub>2</sub>-saturated 0.1 M KOH solution and the corresponding Koutecky–Levich plots of commercial Pt/C (A, D), HNs (B, E), and HNs-Co (C, F) catalysts.

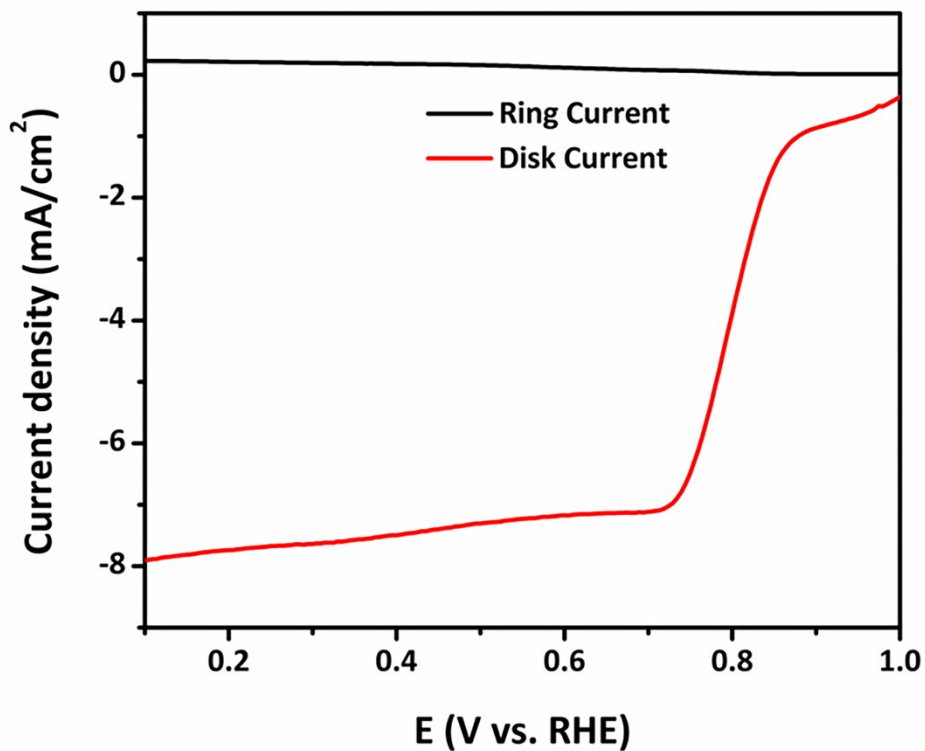

Figure S9 RRDE curve of HNs-Co catalyst.

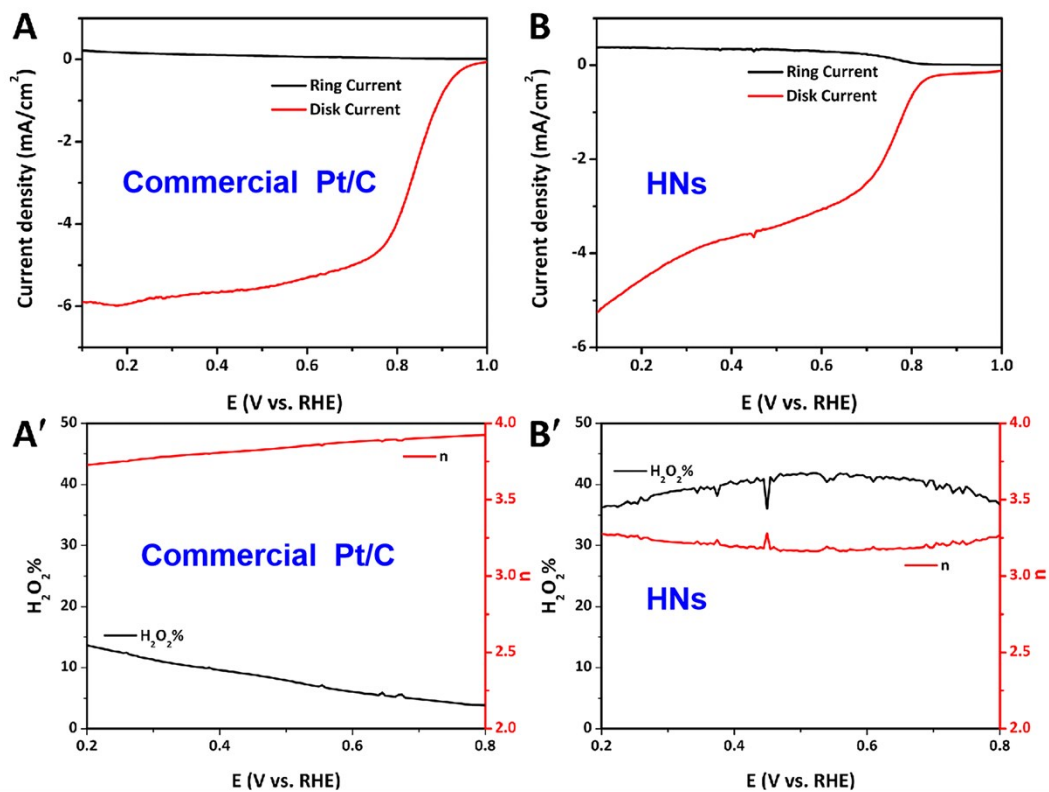

FigureS 10 RRDE curves of commercial JM Pt/C (A, A') and HNs (B, B') catalysts.

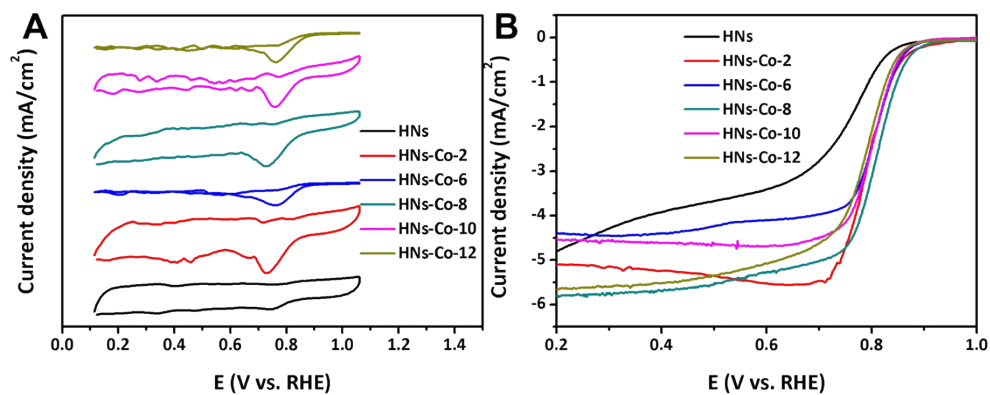

Figure S11 (A) CV and (B) LSV curves of HNs and HNs-Co-X catalysts with different Co contents.

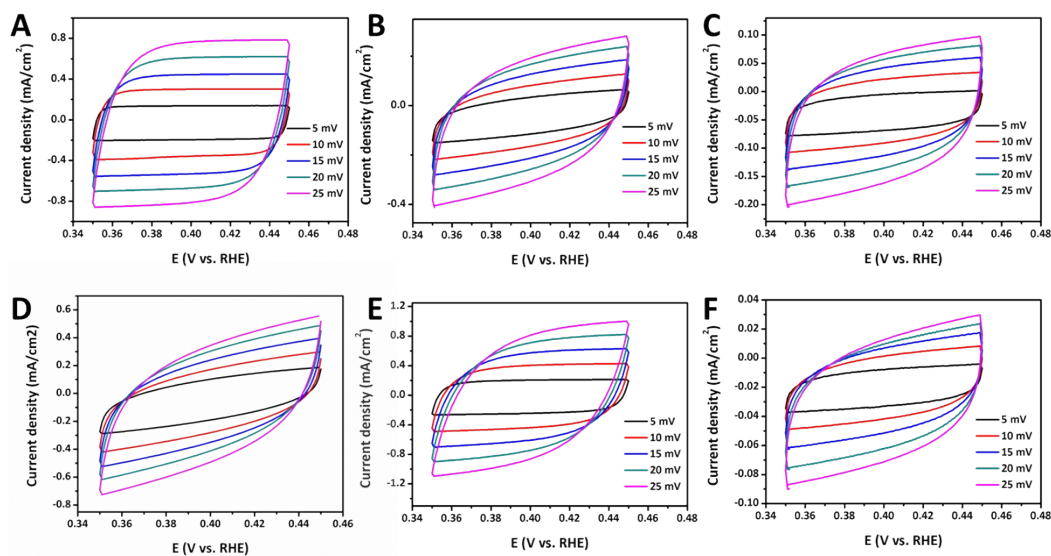

Figure S12 CV curves of (A) HNs, (B) HNs-Co-2, (C) HNs-Co-6, (D) HNs-Co-8, (E) HNs-Co-10, and (F) HNs-Co-12 catalysts at different scan rates between 0.35 V and 0.45 V.

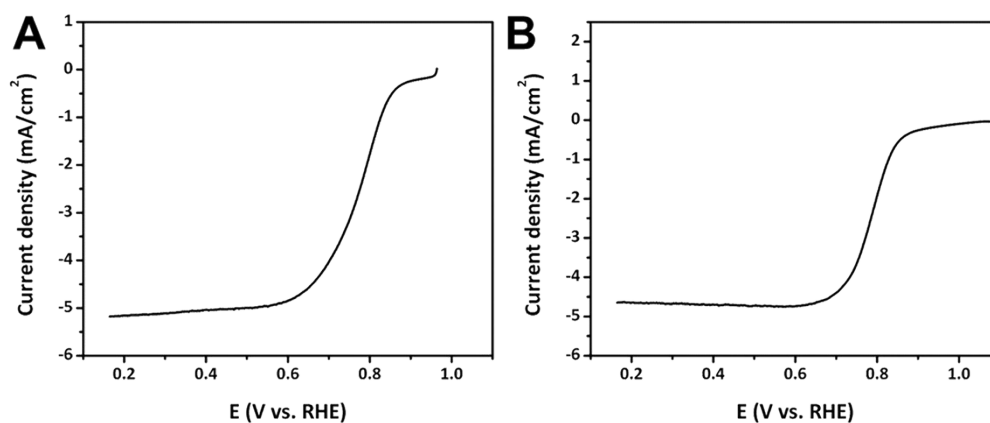

Figure S13 LSV curves of (A) CNN and (B) CNN-Co for ORR.

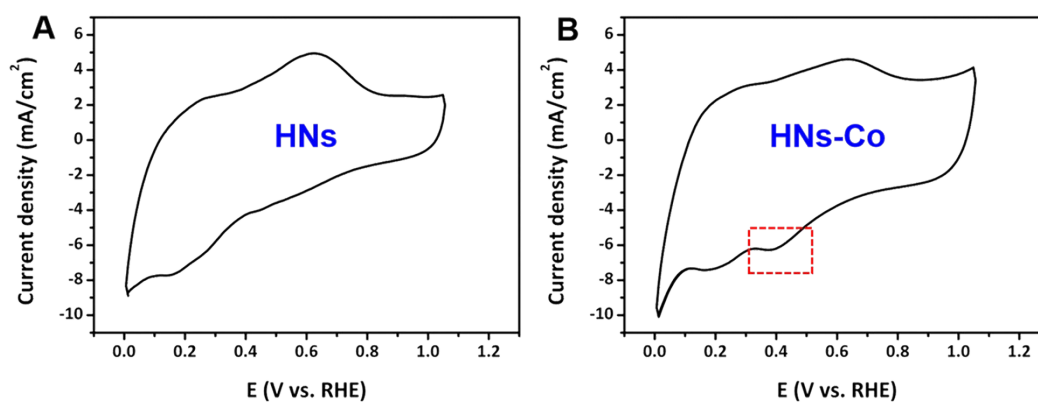

Figure S14 CV curves of (A) HNs and (B) HNs-Co catalysts recorded in 0.1 M  $\text{HClO}_4$  aqueous solution.

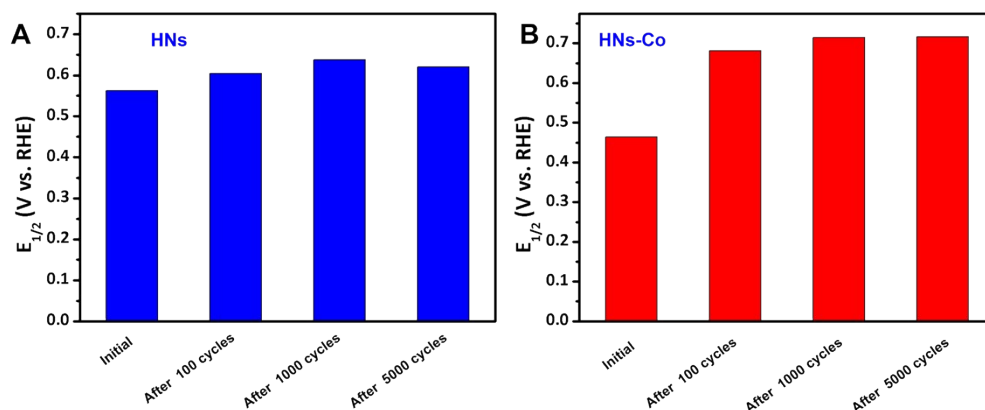

Figure S15  $E_{1/2}$  comparison of (A) HNs and (B) HNs-Co catalysts before and after potential cycling in 0.1 M  $\text{HClO}_4$  aqueous solution.

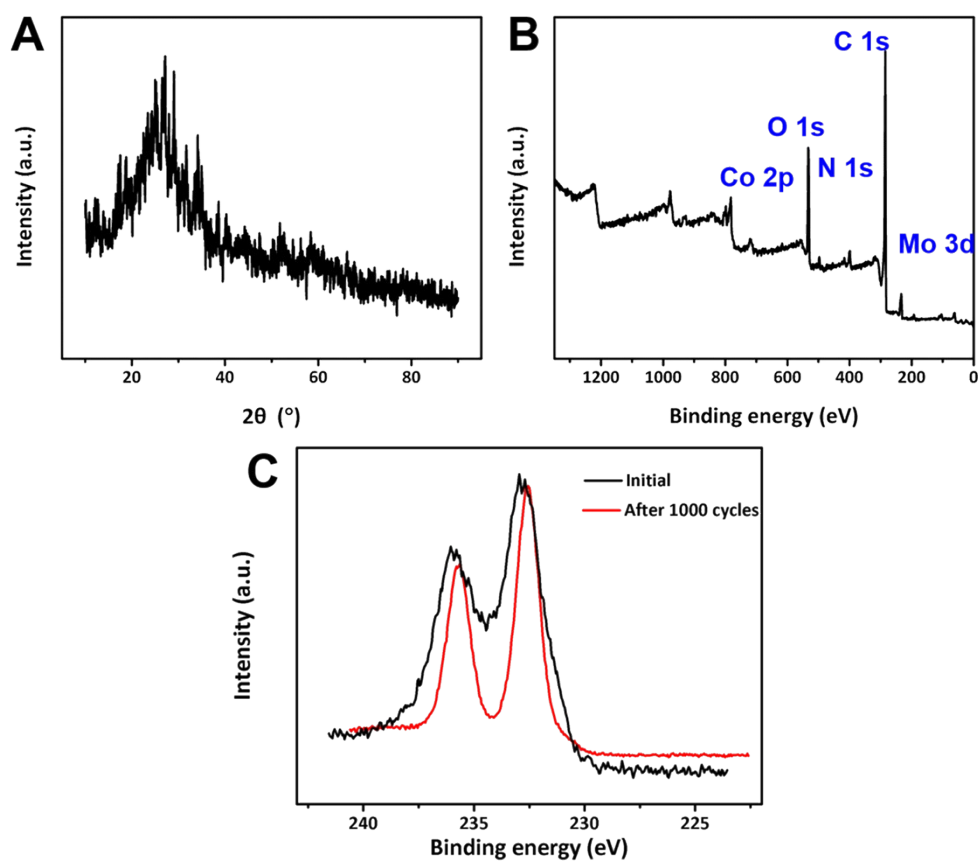

Figure S16 (A) XRD pattern, (B) XPS survey, and (C) high resolution Mo 3d XPS spectra of HNs-Co after 1000 cycles in acidic medium.



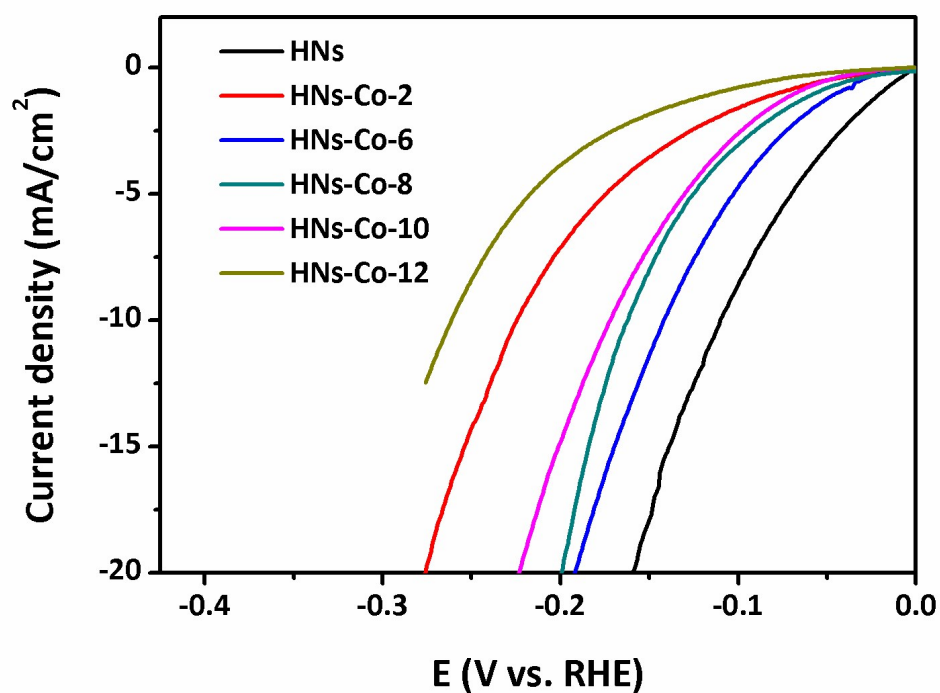

Figure S17 HER LSV curves of HNs, and HNs-Co-X with different Co contents in 1 M KOH aqueous solution.

Table S1 Surface compositions of HNs and HNs-Co-X catalysts measured by XPS.

| Catalysts | C     | N     | O     | Mo   | Co   |
|-----------|-------|-------|-------|------|------|
| HNs       | 67.06 | 13.18 | 14.26 | 5.17 | 0    |
| HNs-Co-2  | 77.11 | 4.25  | 15.05 | 0.96 | 2.63 |
| HNs-Co-6  | 59.82 | 3.1   | 30.63 | 0.69 | 5.77 |
| HNs-Co-8  | 82.54 | 4.15  | 10.73 | 0.59 | 1.98 |
| HNs-Co-10 | 67.65 | 7.87  | 18.79 | 2.44 | 3.25 |
| HNs-Co-12 | 53.78 | 2.68  | 33.75 | 0.74 | 9.05 |

Table S2 Electrical conductive information of the all samples.

| Samples   | Resistivity<br>( $\Omega \cdot \text{cm}$ ) | Conductivity<br>( $\text{s/cm}$ ) |
|-----------|---------------------------------------------|-----------------------------------|
| HNs       | 0.15                                        | $6.67 \cdot 10^{-3}$              |
| HNs-Co-2  | 0.12                                        | $8.33 \cdot 10^{-3}$              |
| HNs-Co-6  | 0.09                                        | $1.11 \cdot 10^{-3}$              |
| HNs-Co-8  | 0.06                                        | $1.67 \cdot 10^{-3}$              |
| HNs-Co-10 | 0.07                                        | $1.43 \cdot 10^{-3}$              |
| HNs-Co-12 | 0.08                                        | $1.25 \cdot 10^{-3}$              |

Table S3 ORR catalysis comparison of HNs-Co and reported Mo-based catalysts in 0.1 M KOH solution.

| Catalyst                 | $E_{1/2}$ (mV) | Reference        |
|--------------------------|----------------|------------------|
| <b>HNs-Co</b>            | <b>0.81</b>    | <b>This work</b> |
| Mo <sub>2</sub> C-GNR    | 0.80           | 1                |
| V-MoS <sub>2</sub> -15   | 0.73           | 2                |
| Mo <sub>2</sub> C-C-5    | 0.71           | 3                |
| Mo-N/C@MoS <sub>2</sub>  | 0.81           | 4                |
| MoO <sub>2</sub> -G-20 h | about 0.66     | 5                |
| rGMS-600                 | 0.70           | 6                |

Table S4 ORR catalysis comparison of HNs-Co and reported Mo-based catalysts in acidic medium.

| Catalyst                                                   | $E_{1/2}$ (mV) | Electrolyte                          | Reference        |
|------------------------------------------------------------|----------------|--------------------------------------|------------------|
| <b>HNs-Co</b>                                              | <b>720</b>     | <b>0.1 M HClO<sub>4</sub></b>        | <b>This work</b> |
| Co <sub>0.6</sub> Mo <sub>1.4</sub> N <sub>2</sub>         | about 500      | 0.1 M HClO <sub>4</sub>              | 7                |
| MoN                                                        | About 325      | 0.1 M HClO <sub>4</sub>              | 8                |
| Co <sub>0.50</sub> Mo <sub>0.50</sub> N <sub>y</sub> /NCNC | about 560      | 0.5 M H <sub>2</sub> SO <sub>4</sub> | 9                |
| (Fe <sub>3</sub> Mo)-N/C-3                                 | 674            | 0.5 M H <sub>2</sub> SO <sub>4</sub> | 10               |
| Mo <sub>2</sub> C-GNR                                      | 600            | 0.5 M H <sub>2</sub> SO <sub>4</sub> | 1                |

Table S5 HER catalysis comparison of HNs, HNs-Co, and reported Mo-based catalysts in 1 M KOH solution.

| Catalyst                            | Overpotential (mV) | Reference        |
|-------------------------------------|--------------------|------------------|
| <b>HNs</b>                          | <b>111</b>         | <b>This work</b> |
| <b>HNs-Co</b>                       | <b>163</b>         | <b>This work</b> |
| MoO <sub>2</sub> -Ni NWs            | 58.4               | 11               |
| MoO <sub>2</sub> /PDDA-rGO          | 57                 | 12               |
| MoSe <sub>2</sub> /MoO <sub>2</sub> | 142                | 13               |
| porous MoO <sub>2</sub>             | 27                 | 14               |
| Mo <sub>2</sub> C/C hybrids         | 140                | 15               |

## Reference

1. X. Fan, Y. Liu, Z. Peng, Z. Zhang, H. Zhou, X. Zhang, B. I. Yakobson, W. A. Goddard, 3rd, X. Guo, R. H. Hauge and J. M. Tour, *ACS nano*, 2017, **11**, 384-394.
2. T. He, L. Xu, Y. Zhang, H. Huang and H. Jiao, *New J. Chem.*, 2019, **43**, 1611-1616.
3. Y. Luo, Z. Wang, Y. Fu, C. Jin, Q. Wei and R. Yang, *J. Mater. Chem. A*, 2016, **4**, 12583-12590.

4. I. S. Amiinu, Z. Pu, X. Liu, K. A. Owusu, H. G. R. Monestel, F. O. Boakye, H. Zhang and S. Mu, *Adv. Funct. Mater.*, 2017, **27**, , 1702300-1702310.
5. C. Zhang, X. Zou, Z. Du, J. Gu, S. Li, B. Li and S. Yang, *Small*, 2018, **14**, 1703960-1703966.
6. R. Kashfi-Sadabad, S. Yazdani, T. D. Huan, Z. Cai and M. T. Pettes, *J. Phys. Chem. C*, 2018, **122**, 18212-18222.
7. B. Cao, J. C. Neufeind, R. R. Adzic and P. G. Khalifah, *Inorg. Chem.*, 2015, **54**, 2128-2136.
8. M. E. Kreider, M. B. Stevens, Y. Liu, A. M. Patel, M. J. Statt, B. M. Gibbons, A. Gallo, M. Ben-Naim, A. Mehta, R. C. Davis, A. V. Ievlev, J. K. Nørskov, R. Sinclair, L. A. King and T. F. Jaramillo, *Chem. Mater.*, 2020, **32**, 2946-2960.
9. T. Sun, Q. Wu, R. Che, Y. Bu, Y. Jiang, Y. Li, L. Yang, X. Wang and Z. Hu, *ACS Catal.*, 2015, **5**, 1857-1862.
10. L. Lin, Z. K. Yang, Y.-F. Jiang and A.-W. Xu, *ACS Catal.*, 2016, **6**, 4449-4454.
11. X. Liu, K. Ni, C. Niu, R. Guo, W. Xi, Z. Wang, J. Meng, J. Li, Y. Zhu, P. Wu, Q. Li, J. Luo, X. Wu and L. Mai, *ACS Catal.*, 2019, **9**, 2275-2285.
12. M. Tian, F. Li, H. Hu, J. Ma and J. Jin, *ChemSusChem*, 2019, **12**, 441-448.
13. C. Jian, Q. Cai, W. Hong, J. Li and W. Liu, *Small*, 2018, **14**, 1703798-1703804.
14. Y. Jin, H. Wang, J. Li, X. Yue, Y. Han, P. K. Shen and Y. Cui, *Adv. Mater.*, 2016, **28**, 3785-3790.
15. L. Chen, H. Jiang, H. Jiang, H. Zhang, S. Guo, Y. Hu and C. Li, *Adv. Energy Mater.*, 2017, **7**, 1602782-1602787.
